# Supplementary material for: Semi-interpenetrating Network Membrane from Polyethyleneimine-Epoxy Resin and Polybenzimidazole for HT-PEM Fuel Cells
Source: Hindawi journal article supplement (doi:10.1155/2020/3845982), 2020-12-29
Supplement: f1 [file 3845982.f1.docx]

Supplementary Materials

**Semi-interpenetrating Network Membrane from Polyethyleneimine-epoxy Resin and Polybenzimidazole for HT-PEM fuel cells**

Chao Meng1, Sheng Huang1, Dongmei Han2, Shan Ren1, Shuanjin Wang1*, Min Xiao1*,

1. *The Key Laboratory of Low-carbon Chemistry & Energy Conservation of Guangdong Province/State Key Laboratory of Optoelectronic Materials and Technologies, School of Materials Science and Engineering, Sun Yat-sen University, Guangzhou, 510275, PR China*
2. *School of Chemical Engineering and Technology, Sun Yat-sen Univeristy, Zhuhai, 519082, PR China.*

Correspondence should be addressed to Shuanjin Wang; [wangshj@mail.sysu.edu.cn](mailto:wangshj@mail.sysu.edu.cn) and Min Xiao; [stsxm@mail.sysu.edu.cn](mailto:stsxm@mail.sysu.edu.cn)

**Table S1** Comparison of the proton conductivity of PA-doped PEI-ER/PBI membrane with some of the reported PA-doped PBI membranes.

| Membrane | ADC(%) | Proton conductivities  (mS cm-1) | Temperature  (℃) | RH(%) | Reference |
| --- | --- | --- | --- | --- | --- |
| m-PBI | 245 | 54 | 160 | 0 | [1] |
| P1 | 241 | 53 | 160 | 0 | [1] |
| PBI poly(benzimidazole) as membrane  materials for fuel cells. | 190 | 26 | 160 | 0 | [2] |
| OPBI | 207 | 35 | 160 | 0 | [3] |
| QOPBI-15 | 167 | 49 | 160 | 0 | [3] |
| CpPBI-10 | 406 | 31 | 160 | 0 | [4] |
| PEI-ER(1:2)/PBI | 102 | 39 | 160 | 0 | This work |
| PEI-ER(2:3)/PBI | 135 | 44 | 160 | 0 | This work |
| PEI-ER(1:1)/PBI | 170 | 48 | 160 | 0 | This work |
| PEI-ER(3:2)/PBI | 272 | 58 | 160 | 0 | This work |
| PEI-ER(2:1)/PBI | 302 | 78 | 160 | 0 | This work |

**REFERENCES**

1. J.-C. Chen, P.-Y. Chen, Y.-C. Liu and K.-H. Chen, "Polybenzimidazoles containing bulky substituents and ether linkages for high-temperature proton exchange membrane fuel cell applications," *Journal of Membrane Science*, vol. 513, no. pp. 270-279, 2016.
2. T.-H. Tang, P.-H. Su, Y.-C. Liu and T. L. Yu, "Polybenzimidazole and benzyl-methyl-phosphoric acid grafted polybenzimidazole blend crosslinked membrane for proton exchange membrane fuel cells," *International Journal of Hydrogen Energy*, vol. 39, no. 21, pp. 11145-11156, 2014.
3. M. Hu, T. Li, S. Neelakandan, L. Wang and Y. Chen, "Cross-linked polybenzimidazoles containing hyperbranched cross-linkers and quaternary ammoniums as high-temperature proton exchange membranes: Enhanced stability and conductivity," *Journal of Membrane Science*, vol. 593, no. pp. 117435, 2020.
4. S. Wang, C. Zhao, W. Ma, G. Zhang, Z. Liu, J. Ni, M. Li, N. Zhang and H. Na, "Preparation and properties of epoxy-cross-linked porous polybenzimidazole for high temperature proton exchange membrane fuel cells," *Journal of Membrane Science*, vol. 411-412, no. pp. 54-63, 2012.
